# Supplementary material for: An anionic Zn-MOF composed of 1D columnar SBUs for highly C2H2/CH4 selective adsorption, dye adsorption and fluorescence sensing
Source: Royal Society of Chemistry journal article supplement (doi:10.1039/d2dt02518c), 2022-01-01
Supplement: d2dt02518c1.pdf [file d2dt02518c1.pdf]

## Electronic Supporting Information

### The anionic framework Zn-MOF composed of 1D columnar SBU has high C<sub>2</sub>H<sub>2</sub>/CH<sub>4</sub> selective adsorption, dye adsorption and fluorescence sensing

Jing-Ru Chen,<sup>a</sup> Li-Na Zheng,<sup>\*a</sup> Xin-Wei Meng,<sup>a</sup> Zhan-Yao Gao,<sup>a</sup> Jing Zhao,<sup>a</sup> Bo Liu<sup>b</sup> and Tao Ding<sup>\*a</sup>

<sup>a</sup>*School of Environmental and Chemical Engineering, Xi'an Polytechnic University, Xi'an 710048, P. R China.*

<sup>b</sup>*College of Chemistry & Pharmacy, Northwest A&F University, Yangling, 712100, P. R. China.*

**Table S1** Selected Bond Length (Å) and Angles (°).

|                                                                                                                                                       |           |                        |            |
|-------------------------------------------------------------------------------------------------------------------------------------------------------|-----------|------------------------|------------|
| Zn(01)-O(2A)#1                                                                                                                                        | 2.04(2)   | Zn(01)-O(2A)#2         | 2.04(2)    |
| Zn(01)-C(1A)#1                                                                                                                                        | 2.582(14) | Zn(01)-N21             | 2.182(13)  |
| Zn(01)-C(1A)#2                                                                                                                                        | 2.582(14) | Zn(02)-O(1)            | 1.9462(11) |
| Zn(02)-N11                                                                                                                                            | 1.891(14) | Zn(02)-O22             | 1.942(9)   |
| O(2A)#1-Zn(01)-O(2A)#2                                                                                                                                | 141.6(15) | N21-Zn(01)-C(1A)#2     | 133.2(6)   |
| N21-Zn(01)-C(1A)#1                                                                                                                                    | 97.8(7)   | N11-Zn(02)-O22         | 106.9(6)   |
| N11-Zn(02)-O(1)                                                                                                                                       | 107.6(5)  | O22-Zn(02)-O(1)        | 107.5(3)   |
| N11-Zn(02)-Zn(02)#3                                                                                                                                   | 84.2(5)   | O22-Zn(02)-Zn(02)#3    | 143.9(3)   |
| O(1)-Zn(02)-Zn(02)#3                                                                                                                                  | 37.45(3)  | Zn(02)#5-O(1)-Zn(02)#6 | 105.10(7)  |
| Zn(02)#5-O(1)-Zn(02)#3                                                                                                                                | 111.70(4) | Zn(02)#6-O(1)-Zn(02)#3 | 111.70(4)  |
| Zn(02)#5-O(1)-Zn(02)                                                                                                                                  | 111.70(4) | Zn(02)#6-O(1)-Zn(02)   | 111.70(4)  |
| Zn(02)#3-O(1)-Zn(02)                                                                                                                                  | 105.10(7) | C21-N11-Zn(02)         | 128.0(10)  |
| C11-N11-Zn(02)                                                                                                                                        | 128.6(12) | C11-N21-Zn(01)         | 119.3(10)  |
| C31-N21-Zn(01)                                                                                                                                        | 134.3(10) | C12-O22-Zn(02)         | 111.1(8)   |
| O(2A)-C(1A)-Zn(01)#1                                                                                                                                  | 50.9(13)  | O(1A)-C(1A)-Zn(01)#1   | 73.3(8)    |
| C(2A)-C(1A)-Zn(01)#1                                                                                                                                  | 66.3(14)  | C(1A)-O(2A)-Zn(01)#1   | 101.3(16)  |
| Symmetrical codes: #1 -x, -y+1, -z+1; #2 x+1/2, -y+1, z-1; #3 -x+1/2, -y+3/2, z; #4 -y+1/2, -x+1/2, -z+1; #5 -y+1, x+1/2, -z+1; #6 y-1/2, -x+1, -z+1. |           |                        |            |

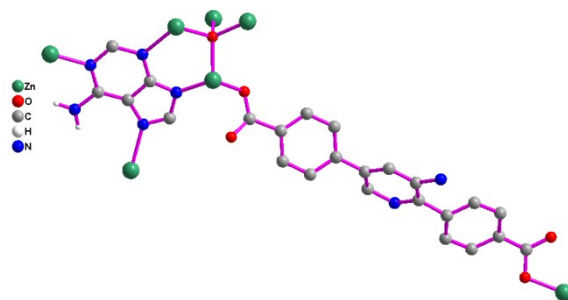

**Figure S1** Coordination modes of the ligands in **Zn-MOF**.

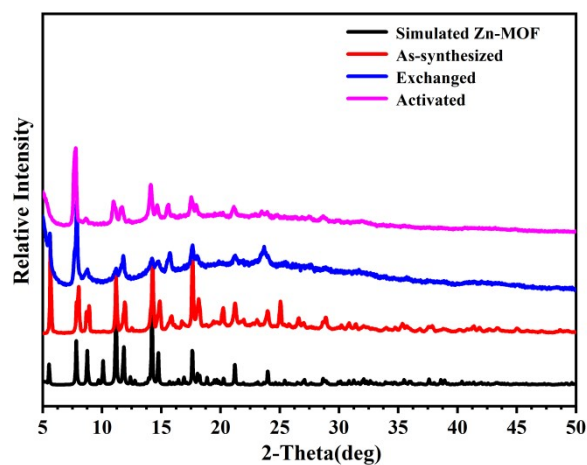

**Figure S2** PXRD: Simulated, as-synthesized, exchange and activated samples.

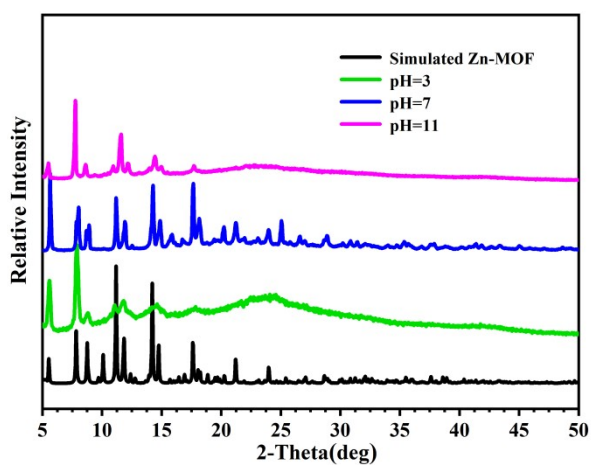

**Figure S3** PXRD: Simulated, pH=3, pH=7 and pH=11 exchange activated samples.

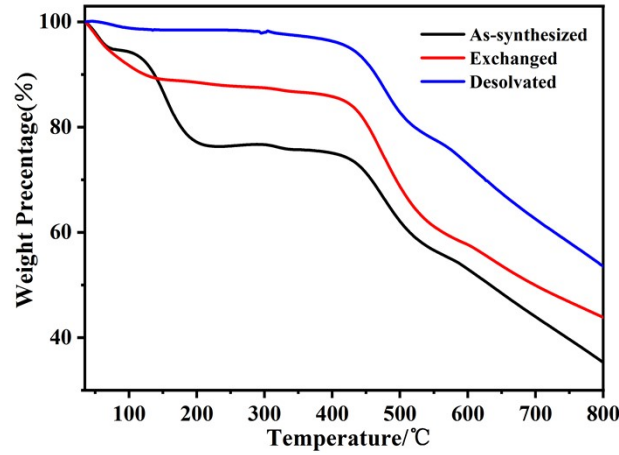

**Figure S4** TGA: as-synthesized, exchanged and desolvated samples.

### IAST adsorption selectivity calculation

The experimental isotherm data for pure  $C_2H_2$ ,  $C_2H_4$ ,  $CO_2$  and  $CH_4$  (measured at 298 K) were fitted using a Langmuir-Freundlich (L-F) model.

$$q = \frac{a * b * p^c}{1 + b * p^c}$$

Where  $q$  and  $p$  are adsorbed amounts and pressures of component  $i$ , respectively. The adsorption selectivities for binary mixtures of  $C_2H_2/CH_4$ ,  $C_2H_4/CH_4$  and  $CO_2/CH_4$  at 298 K, defined by

$$S_{ads} = (q_1 / q_2) / (p_1 / p_2)$$

Where  $q_i$  is the amount of  $i$  adsorbed and  $p_i$  is the partial pressure of  $i$  in the mixture.

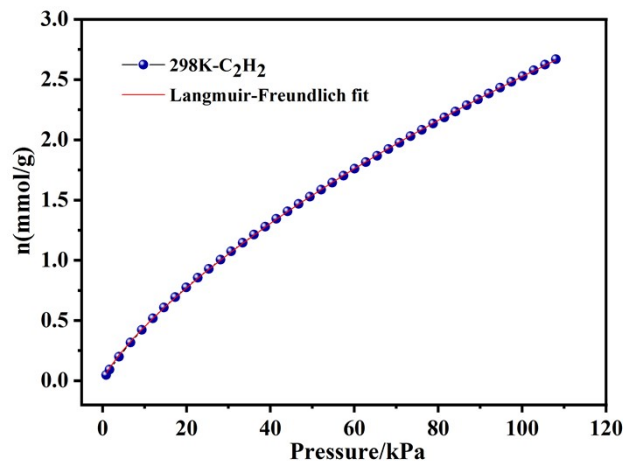

**(a)**

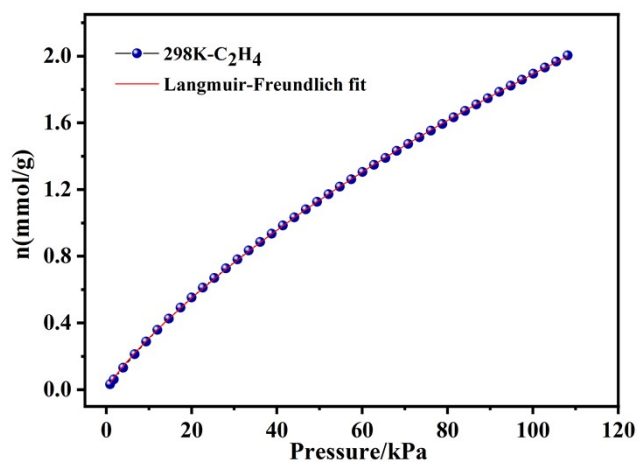

(b)

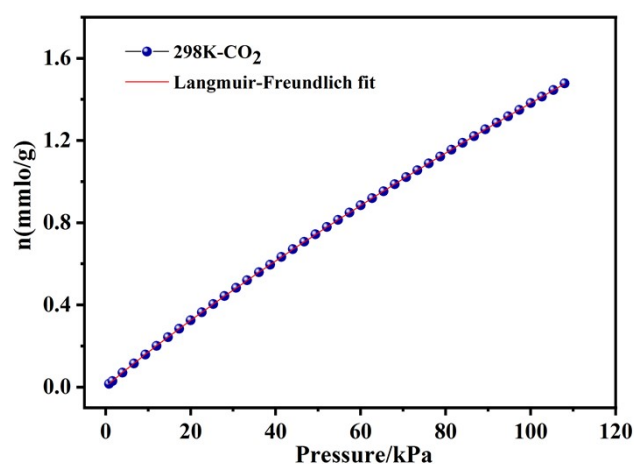

(c)

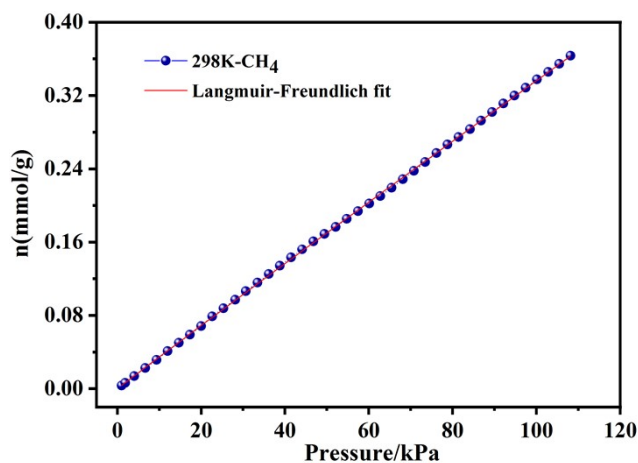

(d)

**Figure S5** (a)  $\text{C}_2\text{H}_2$  adsorption isotherms of **Zn-MOF** at 298 K with fitting by L-F model:  $a=16.34618$ ,  $b=0.00436$ ,  $c=0.18891$ ,  $\text{Chi}^2=3.2826\text{E-}5$ ,  $\text{R}^2=0.99994$ ; (b)  $\text{C}_2\text{H}_4$  adsorption isotherms of **Zn-MOF** at 298 K with fitting by L-F model:  $a=9.79057$ ,  $b=0.00443$ ,  $c=0.13344$ ,  $\text{Chi}^2=1.5219\text{E-}5$ ,  $\text{R}^2=0.99996$ ; (c)  $\text{CO}_2$  adsorption isotherms of **Zn-MOF** at 298 K with fitting

by L-F model:  $a=14.11683$ ,  $b=0.00137$ ,  $c=0.05077$ ,  $\chi^2=5.64383\text{E-}7$ ,  $R^2=1$ ; (d)  $\text{CH}_4$  adsorption isotherms of **Zn-MOF** at 298 K with fitting by L-F model:  $a=26.50021$ ,  $b=1.33808$ ,  $c=0.00879$ ,  $\chi^2=1.33941\text{E-}6$ ,  $R^2=0.99989$ .

### Calculation of sorption heat for $\text{C}_2\text{H}_2$ 、 $\text{C}_2\text{H}_4$ and $\text{CO}_2$ uptakes using Virial 2 model

The above equation was applied to fit the combined  $\text{C}_2\text{H}_2$ 、 $\text{C}_2\text{H}_4$  and  $\text{CO}_2$  and isotherm data for desolvated **Zn-MOF** at 273 and 298 K, where  $P$  is the pressure,  $N$  is the adsorbed amount,  $T$  is the temperature,  $a_i$  and  $b_i$  are virial coefficients, and  $m$  and  $n$  are the number of coefficients used to describe the isotherms.  $Q_{st}$  is the coverage-dependent enthalpy of adsorption and  $R$  is the universal gas constant.

$$\ln P = \ln N + 1/T \sum_{i=0}^m a_i N^i + \sum_{i=0}^n b_i N^i Q_{st} = -R \sum_{i=0}^m a_i N^i$$

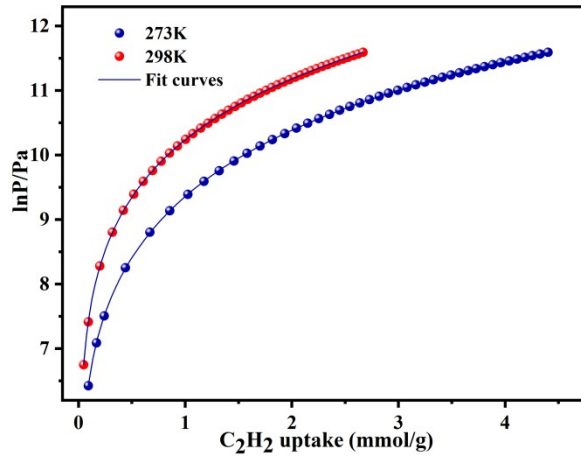

(a)

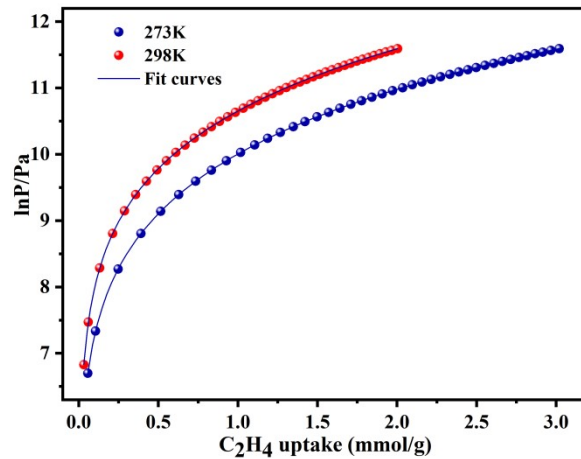

(b)

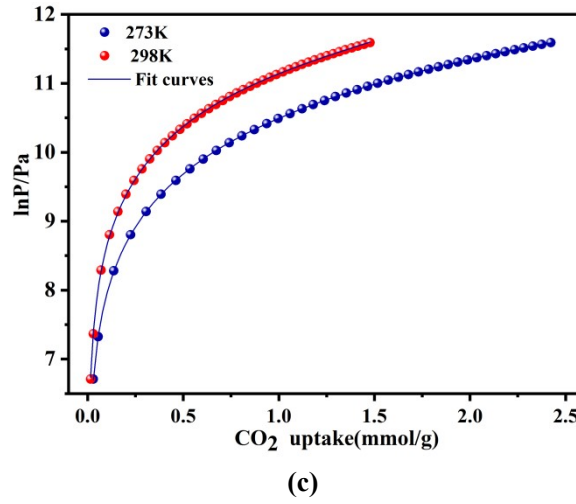

**Figure S6** (a) Virial analysis of the  $C_2H_2$  adsorption data at 298 K and 273 K for **Zn-MOF**. Fitting results:  $a_0=-3286.16843$ ,  $a_1=512.65988$ ,  $a_2=-91.37345$ ,  $a_3=6.29229$ ,  $a_4=-1.14897$ ,  $\chi^2=1.26889E-5$ ,  $R^2=0.99999$ ; (b) Virial analysis of the  $C_2H_4$  adsorption data at 298 K and 273 K for **Zn-MOF**. Fitting results:  $a_0=-2357.196$ ,  $a_1=324.55734$ ,  $a_2=-87.96432$ ,  $a_3=11.04662$ ,  $a_4=-1.21749$ ,  $\chi^2=2.5328E-6$ ,  $R^2=1$ . (c) Virial analysis of the  $CO_2$  adsorption data at 298 K and 273 K for **Zn-MOF**. Fitting results:  $a_0=-2254.39669$ ,  $a_1=-231.24997$ ,  $a_2=654.9978$ ,  $a_3=-267.66544$ ,  $a_4=-5.20644$ ,  $\chi^2=4.83197E-5$ ,  $R^2=0.99996$ .

**Dye adsorption performance.** The adsorption capacity of **Zn-MOF** for various dyes were assessed according to standard methods. The adsorption amounts ( $q_t$  (mg/g),  $q_e$  (mg/g)) and the adsorption rates (removal efficiency,  $R$  %) were calculated by  $E_{qs}$ . (1), (2) and (3), respectively:

$$q_t = \frac{(C_0 - C_t)V}{m} \quad (1)$$

$$q_e = \frac{(C_0 - C_e)V}{m} \quad (2)$$

$$R\% = \frac{C_0 - C_t}{C_0} \times 100\% \quad (3)$$

Herein,  $C_0$ ,  $C_t$  and  $C_e$  (mg  $L^{-1}$ ) are the initial, any time  $t$ , and equilibrium concentrations of the organic dye in solution, respectively,  $V$  (L) represents the volume of the dye solution and adsorbent mass is  $m$  (g).

The adsorption kinetics models of pseudo-first-order and pseudo-second-order were

performed to investigate adsorption mechanism. The pseudo-first-order and pseudo-second-order models were displayed the following:

$$\ln(q_e - q_t) = \ln q_e - k_1 t \quad (4)$$

$$\frac{t}{q_t} = \frac{1}{k_2 q_e^2} + \frac{t}{q_e} \quad (5)$$

Where,  $q_t$  and  $q_e$  (mg/g) are the adsorbed amounts of dye at any time  $t$  and equilibrium, respectively;  $k_1$  ( $\text{min}^{-1}$ ) and  $k_2$  ( $\text{g}/(\text{mg} \cdot \text{min})$ ) are the rate constants of pseudo-first-order and pseudo-second-order.

The theoretical maximum adsorption capacity and adsorption mechanism were assessed through the Langmuir and Freundlich isotherms. Their linear forms were given below:

$$\frac{C_e}{Q_e} = \frac{C_e}{Q_{\max}} + \frac{1}{K_L Q_{\max}} \quad (6)$$

$$\ln Q_e = \ln K_F + \frac{1}{n} + \ln C_e \quad (7)$$

Here,  $C_e$  represents the equilibrium concentration (mg/L) of submethyl blue after the adsorption;  $Q_e$  represents the equilibrium adsorption amount (mg/g) of the adsorbent,  $Q_{\max}$  is the maximum adsorption capacity (mg/g) of the adsorbent, while  $K_L$  (L/mg) is the Langmuir constant determined by the affinity of the binding site, which defines the adsorption energy. The  $K_F$  and  $n_F$  are Freundlich constants, corresponding to the capacity and strength of adsorption, respectively. The value of  $1/n$  determines the tendency of adsorption mechanism and the surface unevenness of adsorbent.

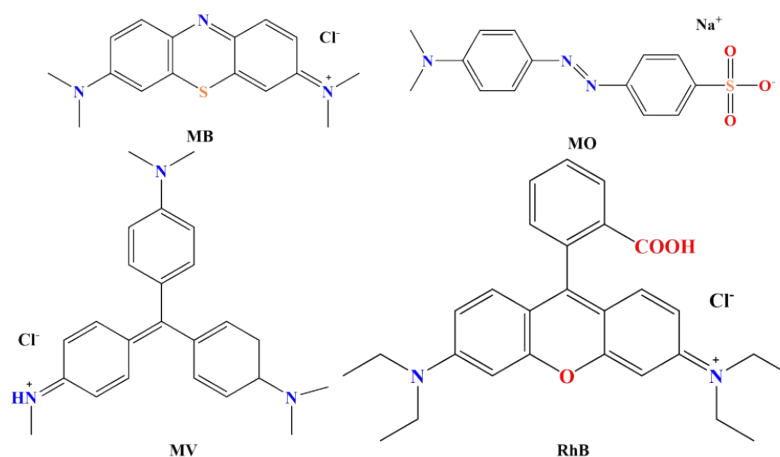

**Scheme S2** Selected cationic dyes (MB, RhB, MV) and anionic Dyes (MO) in adsorption process.

**Table S2** Different dyes relative molecular weight and molecular size.

| Dye | Formula weight | Molecular dimension( $\text{\AA}^3$ ) |
|-----|----------------|---------------------------------------|
| RhB | 479.02         | $13.43 \times 5.35 \times 4.93$       |
| MB  | 373.9          | $1.8 \times 5.5 \times 14.2$          |
| MV  | 408.3          | $4 \times 16.32 \times 14.15$         |
| MO  | 327.33         | $4.5 \times 6.0 \times 14.8$          |

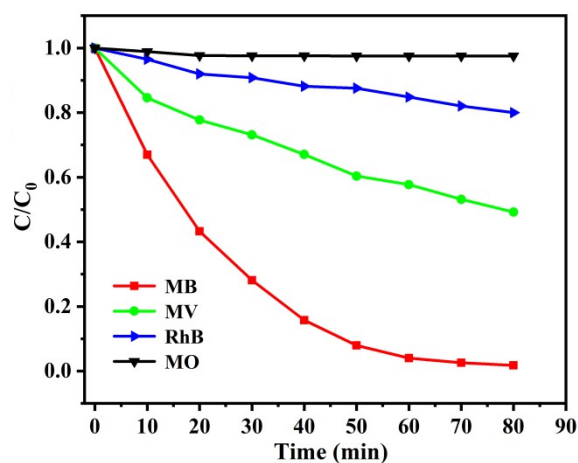

**Figure S7** The absorption rate of **Zn-MOF** by different organic dyes.



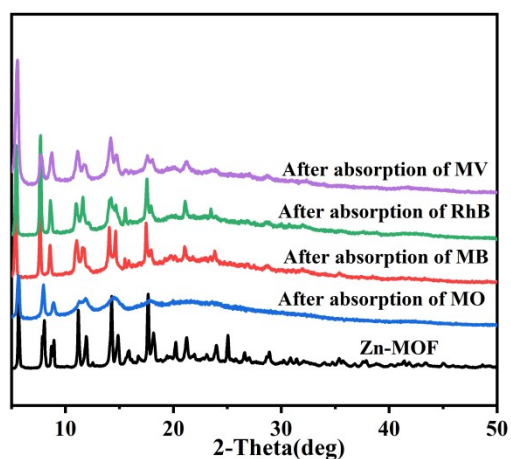

**Figure S8** PXRD: Samples after dye absorption.

**Table S3** Main fitting parameters of the adsorption kinetic model.

| $q_e(\text{mg/g})$ | pseudo-first-order     |                    |         | pseudo-second-order                          |                    |         |
|--------------------|------------------------|--------------------|---------|----------------------------------------------|--------------------|---------|
|                    | $k_1(\text{min}^{-1})$ | $q_e(\text{mg/g})$ | $R^2$   | $k_2(\text{g}/(\text{mg} \cdot \text{min}))$ | $q_e(\text{mg/g})$ | $R^2$   |
| 30.76              | 0.06662                | 27.28              | 0.95411 | 0.00155                                      | 32.368             | 0.98118 |

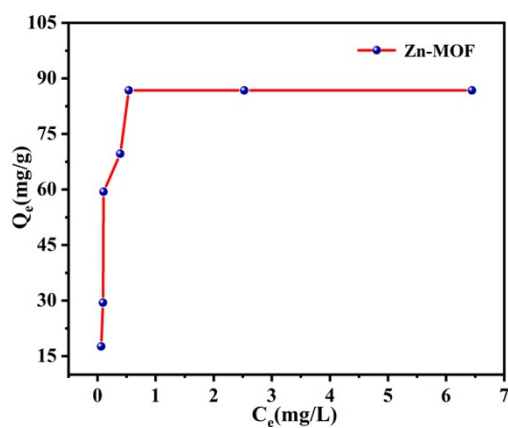

**Figure S9** Adsorption isotherms of MB dye onto **Zn-MOF**.

**Table S4** Isotherm constants of adsorption models for MB dye.

| dye | absorbent     | Langmuir constants      |       |         | Freundlich constants |        |         |
|-----|---------------|-------------------------|-------|---------|----------------------|--------|---------|
|     |               | $Q_{\max}(\text{mg/g})$ | $K_L$ | $R^2$   | $1/n$                | $K_F$  | $R^2$   |
| MB  | <b>Zn-MOF</b> | 83.75                   | 15.24 | 0.99422 | 0.27493              | 69.225 | 0.50461 |

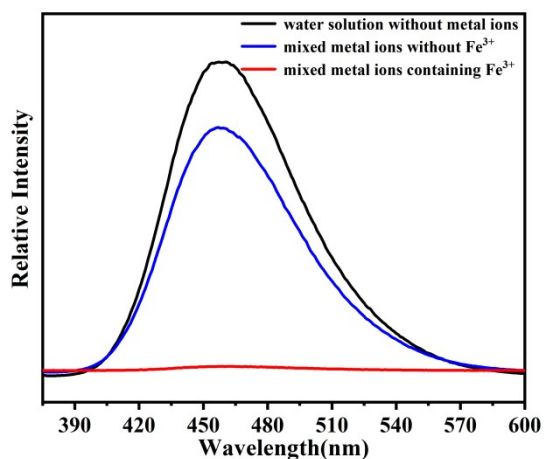

**Figure S10** Fluorescence emission spectra of **Zn-MOF** in different mixed metal ion solutions.

**Table S5** A comparison of various fluorescent materials used for detecting  $\text{Fe}^{3+}$ .

| Fluorescent materials                                                                                  | Luminescent substrates | $K_{SV}/\text{M}^{-1}$ | detection limit/M     | Ref.      |
|--------------------------------------------------------------------------------------------------------|------------------------|------------------------|-----------------------|-----------|
| $\{[\text{Cd}(\text{L})(\text{BPDC})] \cdot 2\text{H}_2\text{O}\}_n$                                   | $\text{Fe}^{3+}$       | $3.63 \times 10^4$     | $2.21 \times 10^{-6}$ | 22a       |
| $[\text{Cd}_2(\text{pbdc})(\text{H}_2\text{O})_3]$                                                     | $\text{Fe}^{3+}$       | $1.86 \times 10^5$     | -                     | 22b       |
| $[\text{Zn}_5(\text{L}_5)_4(\text{trz})_2(\text{H}_2\text{O})_2]$                                      | $\text{Fe}^{3+}$       | $4.1 \times 10^5$      | -                     | 22c       |
| $\{[\text{Cd}_{1.5}(\text{DBPT})(\text{DiPyDz})(\text{H}_2\text{O})] \cdot 3.5\text{H}_2\text{O}\}_n$  | $\text{Fe}^{3+}$       | $4.78 \times 10^5$     | -                     | 22d       |
| $[(\text{CH}_3)_2\text{NH}_2]_6[\text{Cd}_3\text{L}(\text{H}_2\text{O})_2] \cdot 12\text{H}_2\text{O}$ | $\text{Fe}^{3+}$       | $2.67 \times 10^5$     | -                     | 22e       |
| $[\text{Cd}(\text{bci})]_n \cdot 2n(\text{H}_2\text{O})$                                               | $\text{Fe}^{3+}$       | $1.136 \times 10^4$    | $2.15 \times 10^{-4}$ | 23a       |
| $\text{Eu}(\text{C}_{22}\text{H}_{14}\text{O}_2)_3$                                                    | $\text{Fe}^{3+}$       | -                      | $10^{-4}$             | 23b       |
| $\text{Eu}(\text{acac})_3 \subset \text{Zn}(\text{C}_{15}\text{H}_{12}\text{NO}_2)_2$                  | $\text{Fe}^{3+}$       | -                      | $5 \times 10^{-3}$    | 23c       |
| <b>Zn-MOF</b>                                                                                          | $\text{Fe}^{3+}$       | $5.35 \times 10^5$     | $2.98 \times 10^{-4}$ | This work |

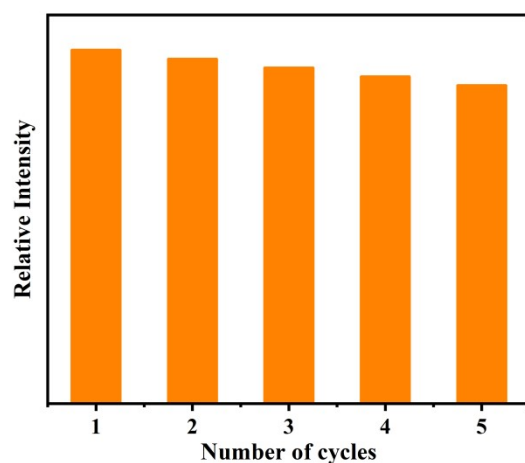

**Figure S11** Multiple cycles for the fluorescence quenching of **Zn-MOF** by  $\text{Fe}^{3+}$  and recovery after washing by  $\text{H}_2\text{O}$  for several times.

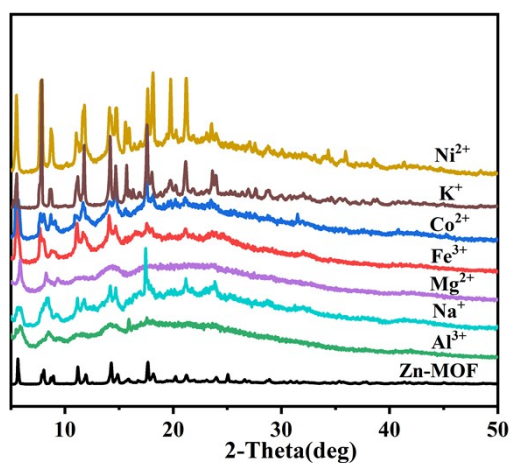

**Figure S12** PXRD patterns of **Zn-MOF** immersed in different metal ion solutions.

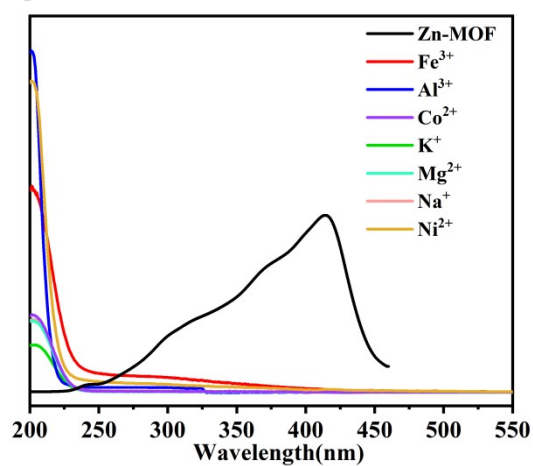

**Figure S13** UV-vis adsorption spectra of  $\text{M}(\text{NO}_3)_x$  aqueous and the excitation spectrum of **Zn-MOF**.

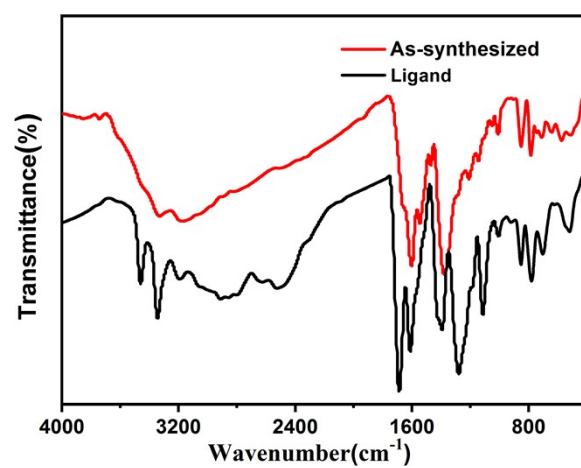

**Figure S14** IR spectra of the as-synthesized **Zn-MOF** and ligand.
